# Supplementary material
Source: publisher figshare collection journal article supplement (https://tandf.figshare.com/ndownloader/files/20805321)
Supplement: Supplementary file 1 [file 20805321]

Supporting information

**Synthesis of biologically active copper oxide nanoparticles as promising novel antibacterial-antibiofilm agents**

Fatih ERCIa,b, *, Rabia CAKIR-KOCb, Mustafa YONTEMa, Emrah TORLAKc

a Department of Biotechnology, Faculty of Science, Necmettin Erbakan University, Konya-TURKEY

b Department of Bioengineering, Faculty of Chemical and Metallurgical Engineering, Yildiz Technical University, Istanbul-TURKEY

c Department of Molecular Biology and Genetics, Faculty of Science, Necmettin Erbakan University, Konya-TURKEY

*Corresponding author:

Fatih Erci

Email: fxerci@gmail.com, ferci@erbakan.edu.tr

Phone:+90 5061499841


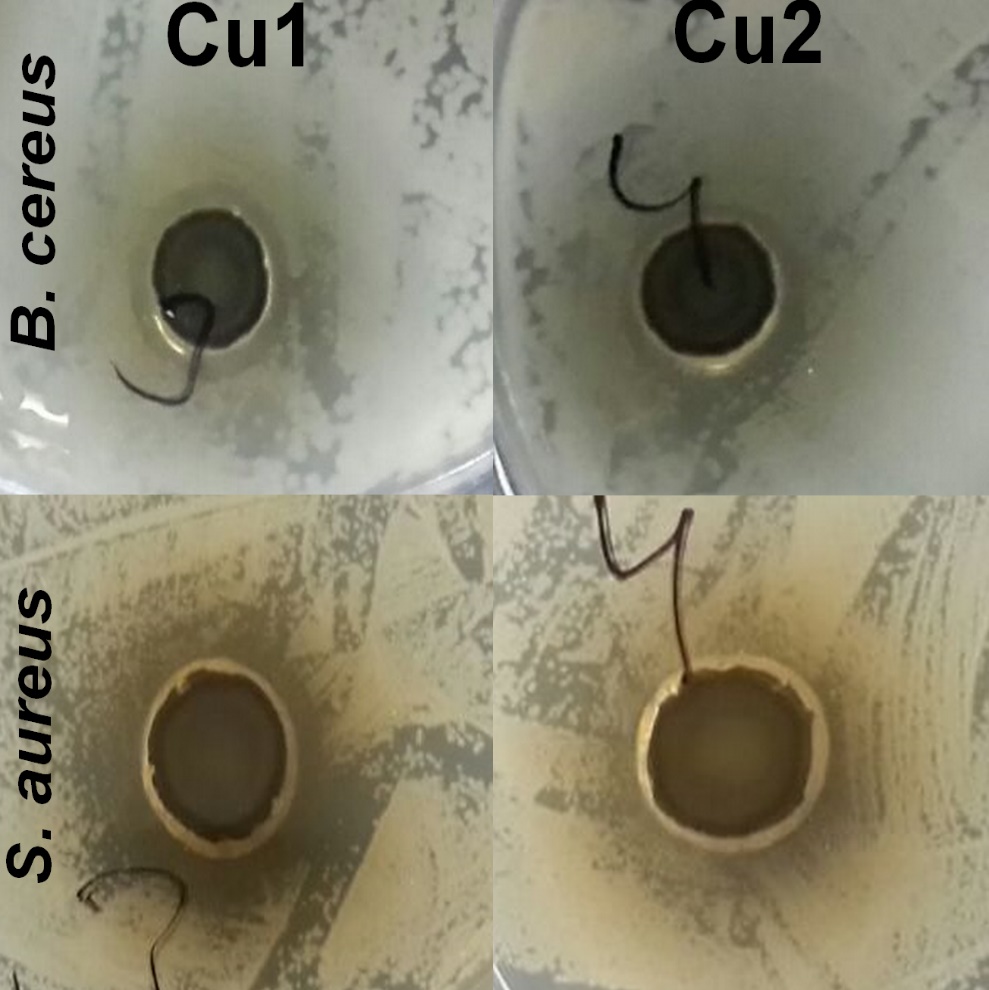


**Figure S1**. Antibacterial acitivity of biosynthesized copper oxide nanoparticles.

Cu1 denotes Ts1CuONPs

Cu2 denotes Ts2CuONPs

**
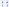
**


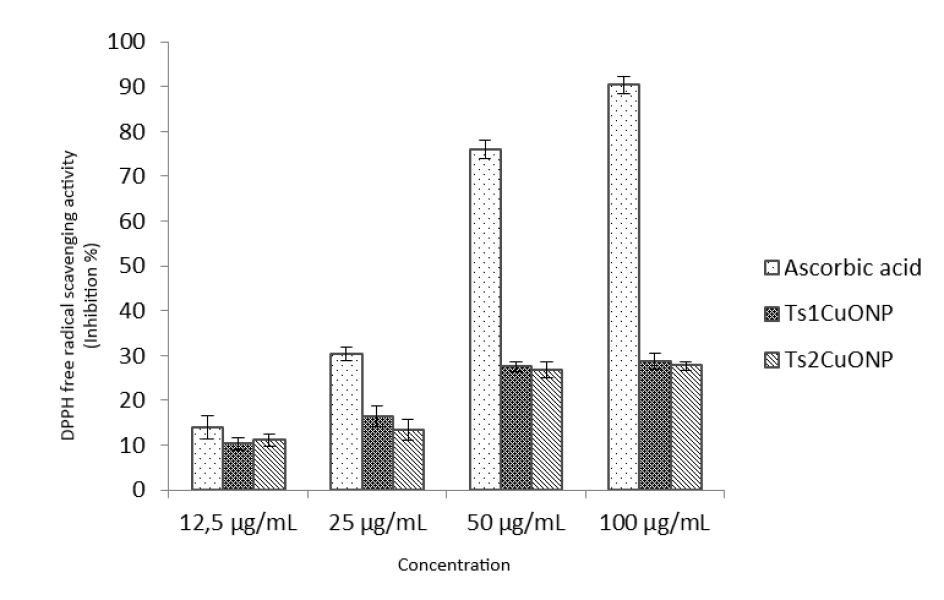


**Figure S2.** DPPH free radical scavenging activity of copper oxide nanoparticles
